# Supplementary material for: Environmental materials: CO 2 -adsorbing clays for enhancing soil fertility and agricultural sustainability
Source: Royal Society of Chemistry journal article supplement (doi:10.1039/d4ma01246a), 2025-01-01
Supplement: d4ma01246a1.pdf [file d4ma01246a1.pdf]

**Environmental Material: CO<sub>2</sub>-Adsorbing Clays for Enhancing Soil Fertility and Agricultural Sustainability**

**Faizah Altaf<sup>1</sup>, Shakeel Ahmed<sup>2</sup>, Shahid Ali<sup>1</sup>, Muhammad Mansha<sup>1</sup>, Safyan Akram Khan<sup>1\*</sup>**

*<sup>1</sup> Interdisciplinary Research Center for Hydrogen and Energy Storage (IRC-HES), King Fahd University of Petroleum & Minerals (KFUPM), Dhahran, 31261 Saudi Arabia*

*<sup>2</sup> School of Material Science and Engineering, Henan University of Technology, Zhengzhou 450001, Henan, China*

**Corresponding Author:** Safyan Akram Khan ([safyan@kfupm.edu.sa](mailto:safyan@kfupm.edu.sa)).

## % Yield calculation

Kaolinite surface was modified with an organic modifying agent, CTAB (Cetyltrimethylammonium bromide). The percentage modification yield was 79.21%, calculated by Equation 1. This yield reflects the amount of CTAB incorporated onto the kaolinite surface. Polyethyleneimine (PEI) was then impregnated into the CTAB-modified kaolinite. The impregnation yield calculated using Equation 2. This was 88.69%, which is essential for estimating the sorption sites involved for CO<sub>2</sub> adsorption. Modifying inorganic kaolinite to enhance its compatibility with organic polymers, improving the impregnation process. This modification increases the adsorption capacity by creating more sorption sites, thereby enhancing the potential for CO<sub>2</sub> adsorption.

The percentage yield was calculated in two steps to confirm the success of the reaction:

$$\text{Percentage modification yield} = \frac{\text{Mass of pure Kaolinite}}{\text{Mass of CTAB modified Kaolinite}} \times 100 \quad (1)$$

and

$$\text{Percentage impregantion yield} = \frac{\text{Mass of CTAB Kaolinite}}{\text{Mass of CKP composite}} \times 100 \quad (2)$$

**Table S1.** Code and composition of prepared samples

| Sr. No | Cod    | Composition                                                                                               |
|--------|--------|-----------------------------------------------------------------------------------------------------------|
| 1      | PK     | Pure Kaolinite                                                                                            |
| 2      | CKP-0  | Cetyltrimethylammonium bromide (CTAB) modified pure Kaolinite                                             |
| 3      | CKP-30 | 30 wt % Polyethyleneimine (PEI) impregnated cetyltrimethylammonium bromide (CTAB) modified pure Kaolinite |
| 4      | CKP-50 | 50 wt % Polyethyleneimine (PEI) impregnate cetyltrimethylammonium bromide (CTAB) modified pure Kaolinite  |
